# Supplementary material for: A fundamental understanding of structure evolution in the synthesis of hard carbon from coal tar pitch for high-performance sodium storage
Source: Royal Society of Chemistry journal article supplement (doi:10.1039/d3ta04941h), 2023-01-01
Supplement: d3ta04941h1.pdf [file d3ta04941h1.pdf]

**Fundamental understanding of structure evolution in the synthesis of hard carbon from coal tar pitch for high-performance sodium storage**

Lichang Ji <sup>a,d,1</sup>, Yun Zhao <sup>a,b,1,\*</sup>, Lijuan Cao <sup>c</sup>, Yong Li <sup>d</sup>, Canliang Ma <sup>a</sup>, Xingguo Qi <sup>e</sup>, Zongping Shao <sup>f,\*</sup>

<sup>a</sup> *Institute of Molecular Science, Key Laboratory of Materials for Energy Conversion and Storage of Shanxi Province, Key Laboratory of Chemical Biology and Molecular Engineering of Education Ministry, Shanxi University, Taiyuan 030006, P.R. China*

<sup>b</sup> *Shanxi-Zheda Institute of Advanced Materials and Chemical Engineering, Taiyuan 030006, P.R. China*

<sup>c</sup> *CAS Key Laboratory of Carbon Materials, National Engineering Laboratory for Carbon Fiber Technology, Institute of Coal Chemistry, Chinese Academy of Sciences, Taiyuan, 030001, PR China*

<sup>d</sup> *Research Center for Fine Chemicals Engineering, Shanxi University, Taiyuan 030006, P.R. China*

<sup>e</sup> *Shanxi Huana Carbon Energy Technology Co., Ltd., Taiyuan 030006, P.R. China*

<sup>f</sup> *WA School of Mines: Minerals Energy and Chemical Engineering (WASM-MECE)  
Curtin University, Perth, WA 6102, Australia*

---

\* Corresponding authors.

1 The authors contributed equally to this work.

E-mails: zhaoyun@sxu.edu.cn (Y. Zhao); shaozp@njtech.edu.cn (Z.P. Shao).

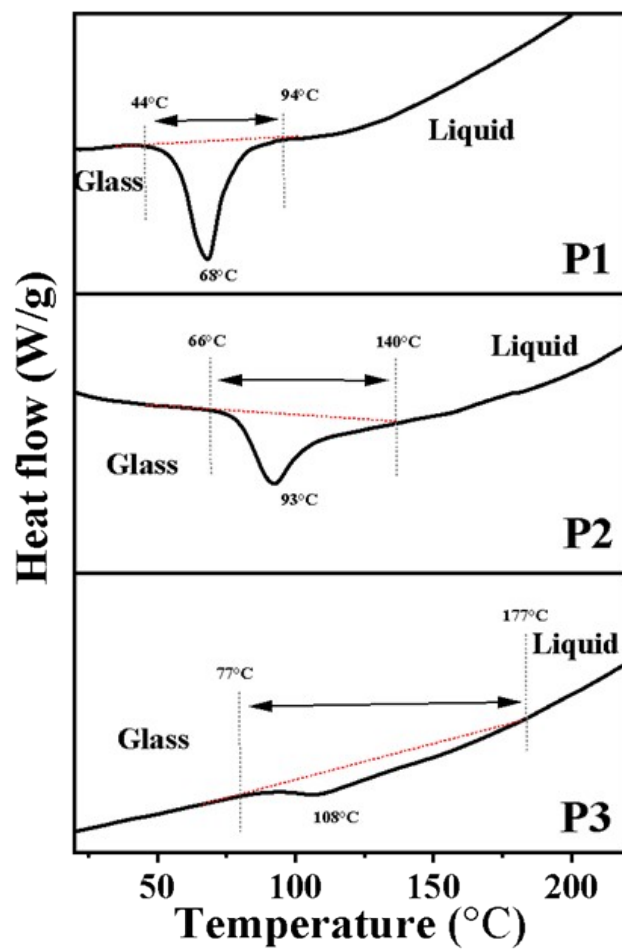

Fig. S1 The DSC curves of P1, P2 and P3.

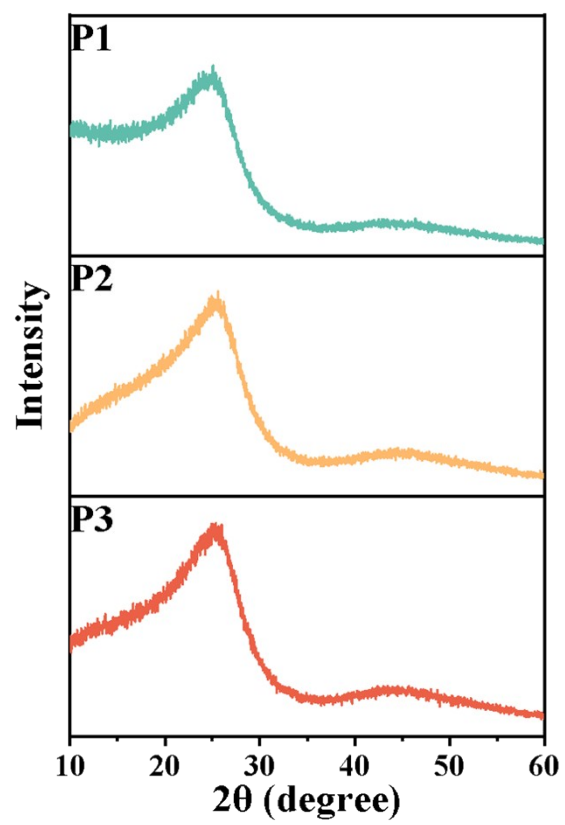

**Fig. S2** XRD patterns of CTPs.

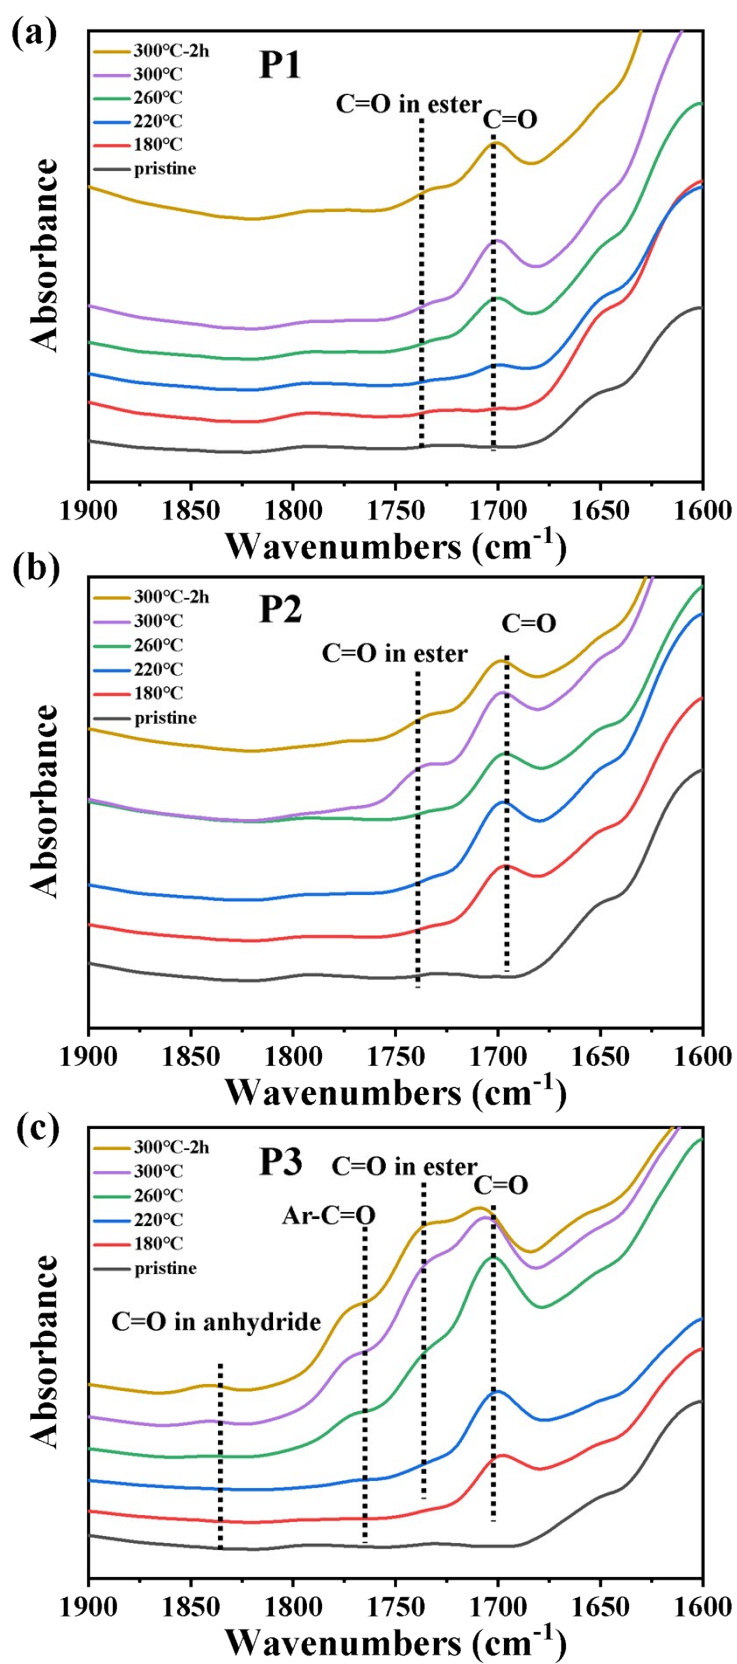

Fig. S3 Ex-situ FTIR spectra of (a) P1 (b) P2 and (c) P3 during the pre-oxidation process.

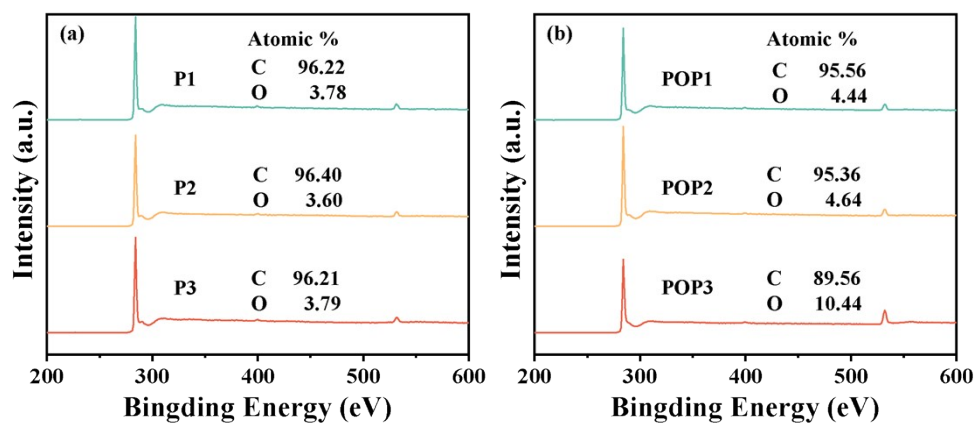

**Fig. S4** XPS spectra of (a) pristine CTPs and (b) pre-oxidized CTPs.

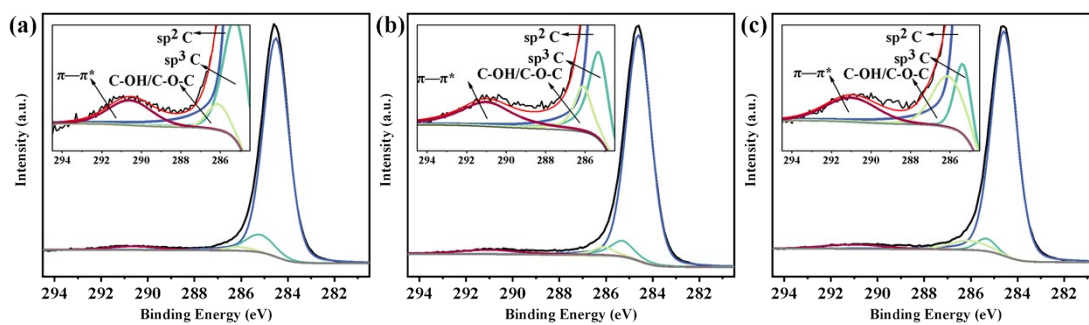

**Fig. S5** The fitted XPS C1s profiles of (a) P1, (b) P2, and (c) P3.

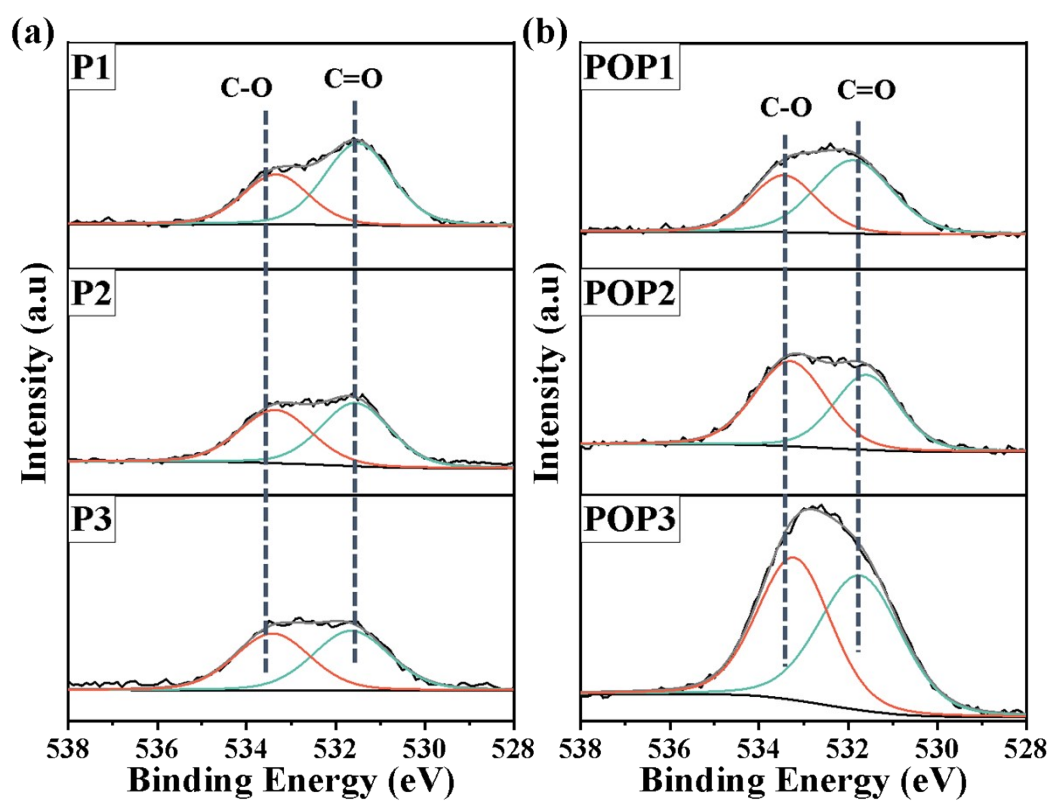

Fig. S6 The fitted XPS O1s profiles of (a) pristine CTPs and (b) pre-oxidized CTPs.

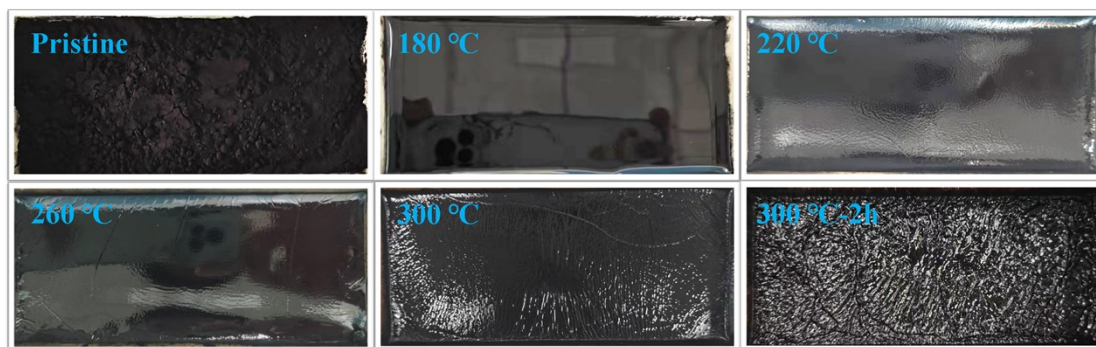

Fig. S7 The ex-situ optical images of P1 at different pre-oxidation stages.

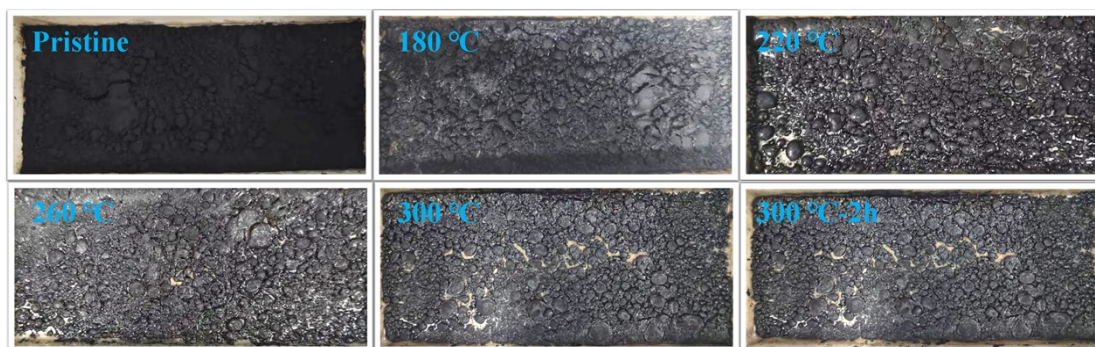

**Fig. S8** The ex-situ optical images of P2 at different pre-oxidation stages.

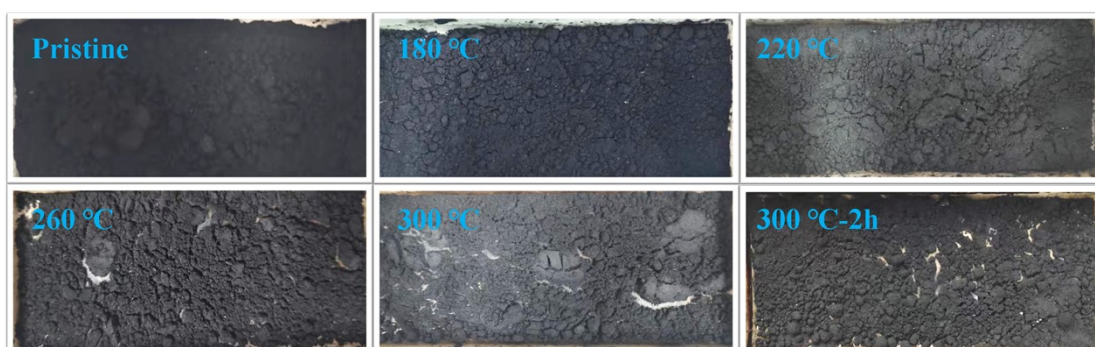

**Fig. S9** The ex-situ optical images of P3 at different pre-oxidation stages.

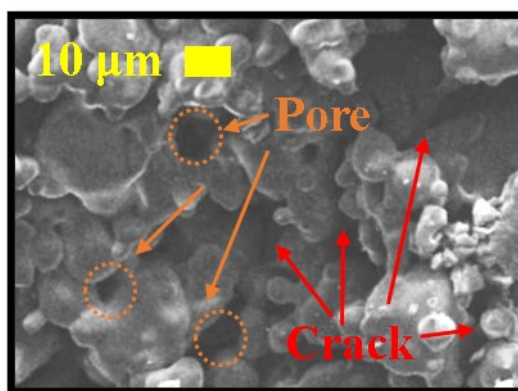

**Fig. S10** The magnified SEM image of POP3.



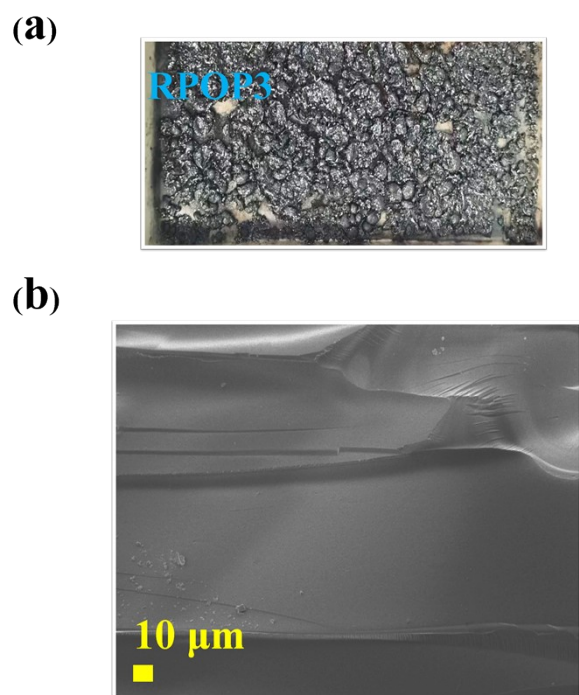

Fig. S11 (a) Optical image and (b) SEM image of RPOP3.

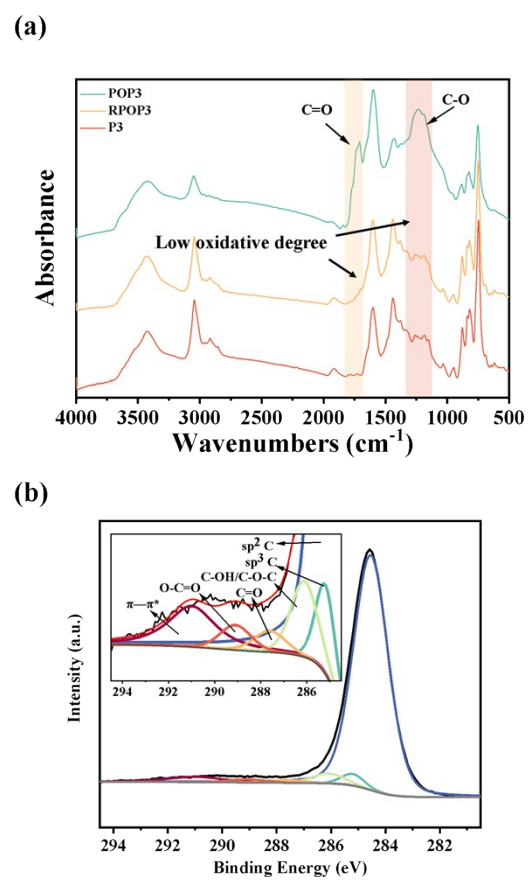

Fig. S12 (a) FTIR spectra of P3, RPOP3 and POP3, (b) The fitted XPS C1s spectrum of RPOP3.



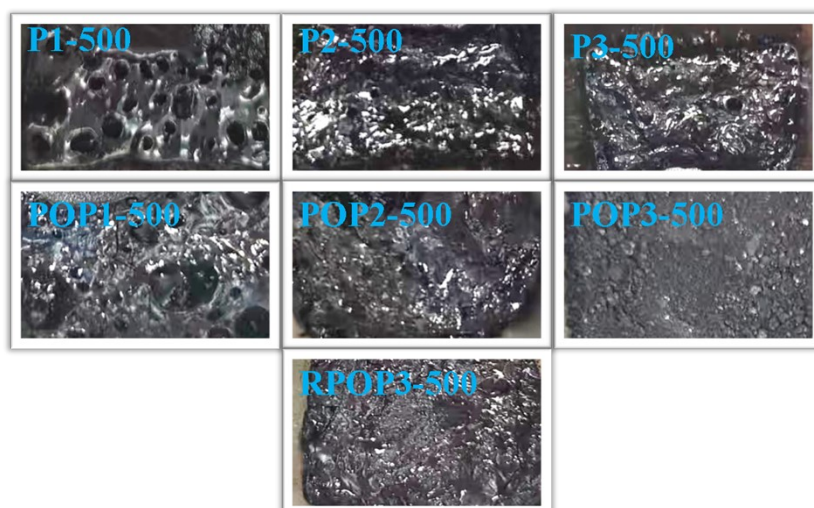

**Fig. S13** Optical images of CTPs treated at 500 °C.

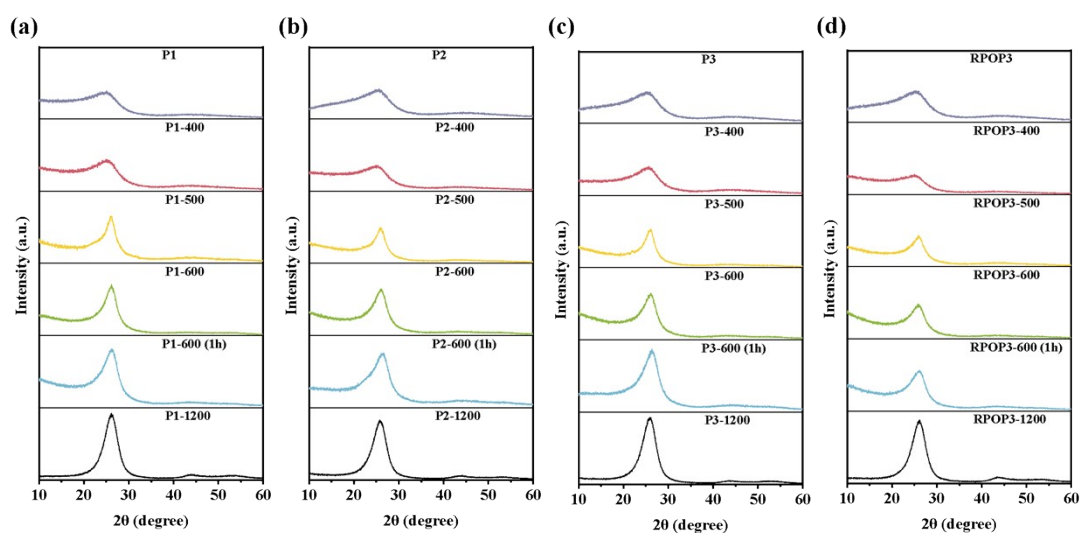

**Fig. S14** Ex-situ XRD of (a) P1, (b) P2, (c) P3, and (d) RPOP3 during the carbonization process

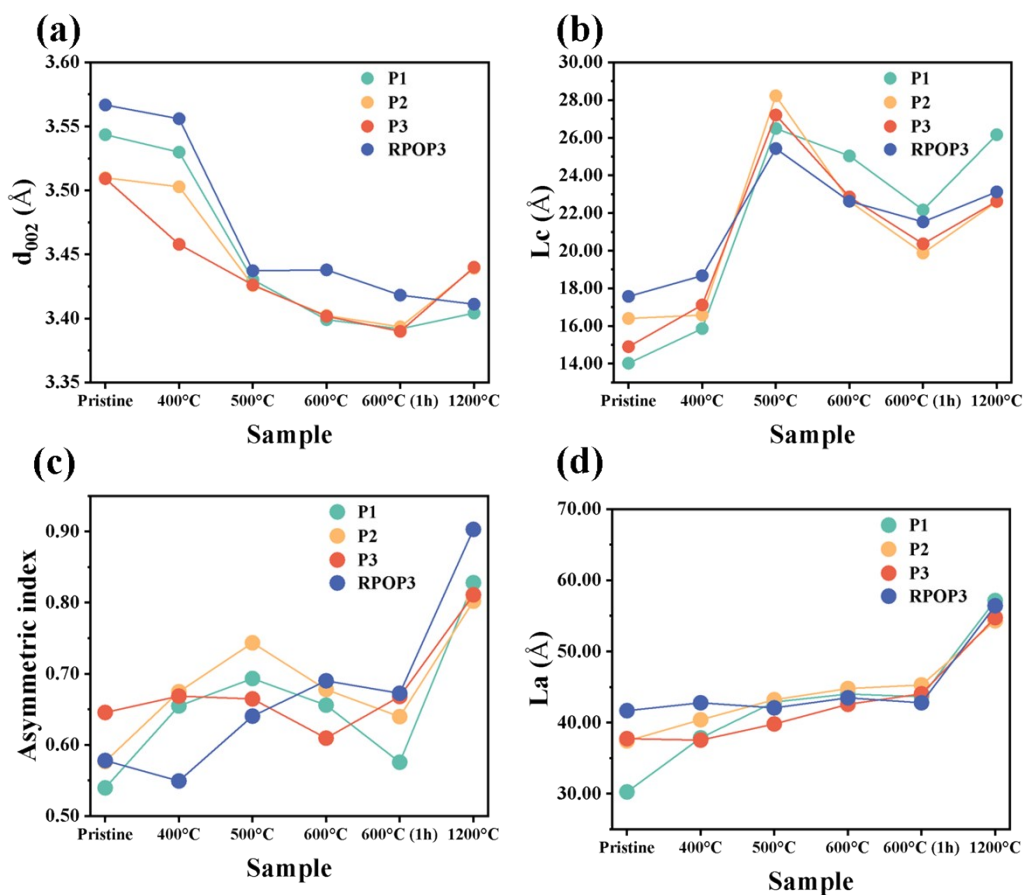

Fig. S15 Variation trends of (a)  $d_{002}$  values, (b)  $L_c$  values, (c) Asymmetric index, and (d)  $L_a$  values for P1, P2, P3 and RPOP3.

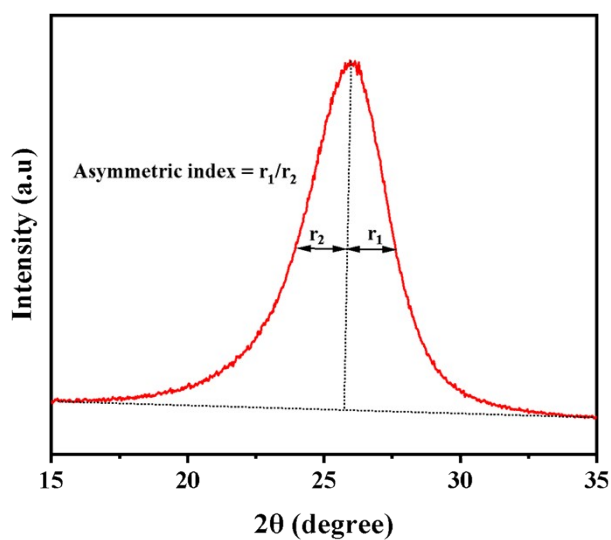

Fig. S16 Illustration of the calculation for asymmetric index (AI).<sup>1</sup>

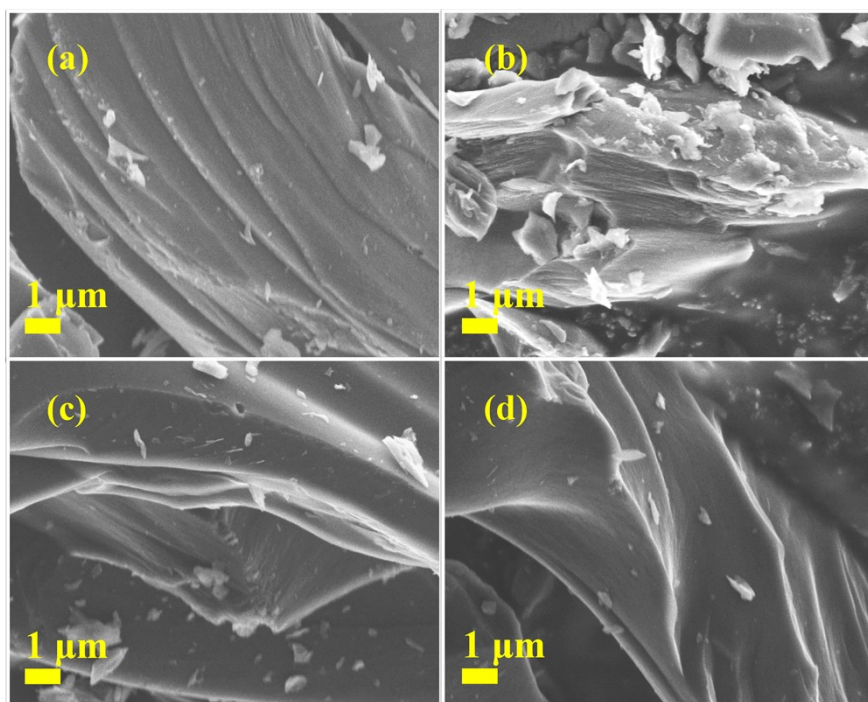

**Fig. S17** SEM images of (a) P1-1200, (b) P2-1200, (c) P3-1200 and (d) RPOP3-1200.

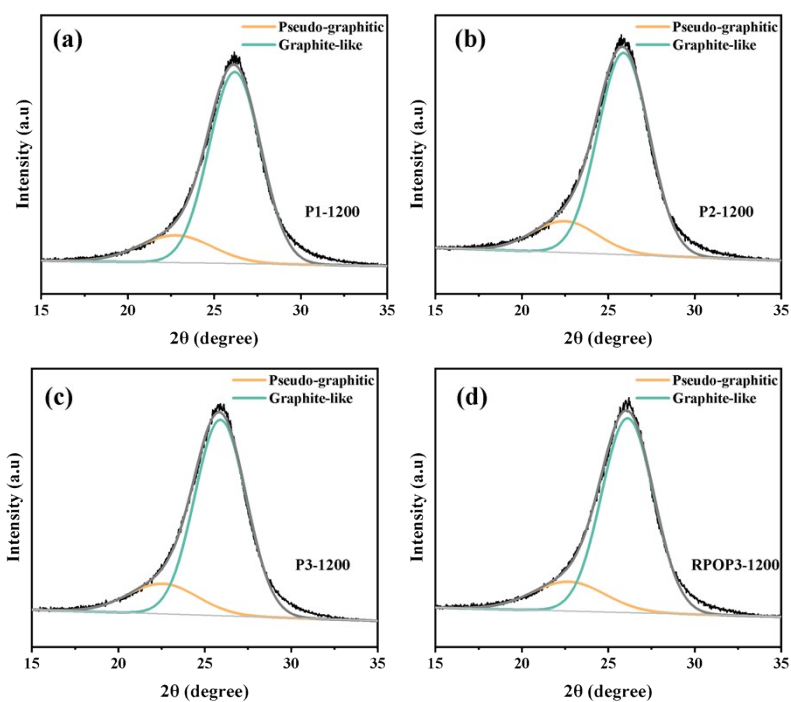

**Fig. S18** The fitted XRD results of (a) P1-1200, (b) P2-1200, (c) P3-1200 and (d) RPOP3-1200, respectively.

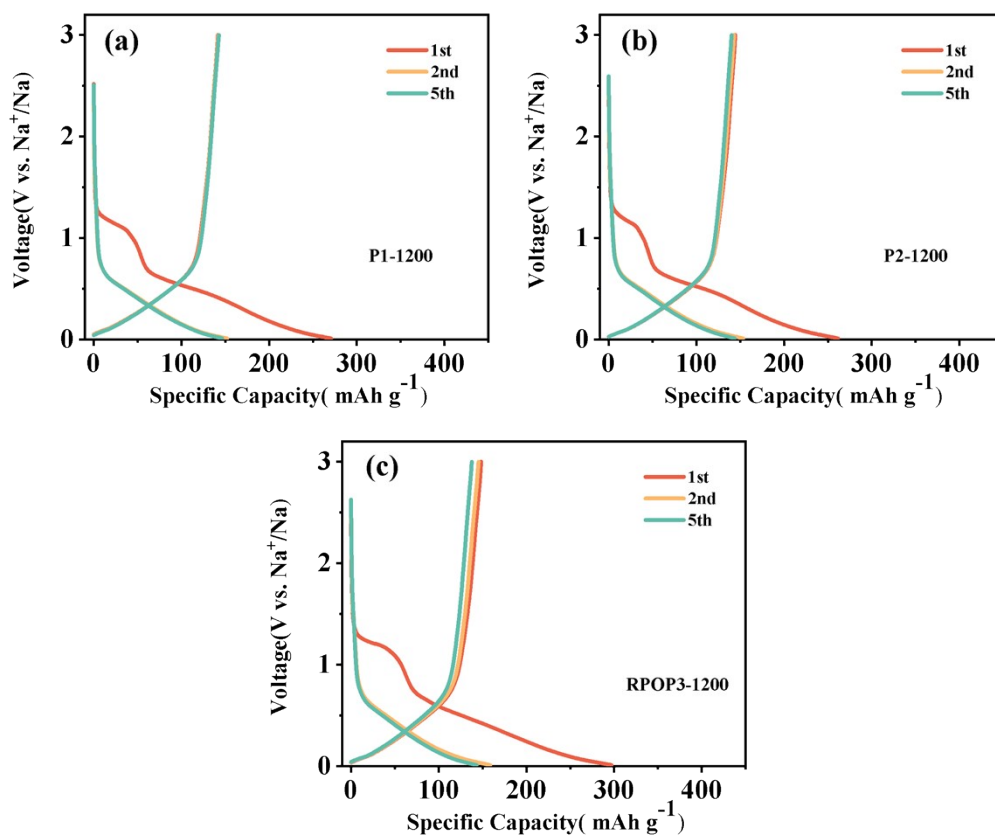

**Fig. S19** GCD curves of (a) P1-1200, (b) P2-1200 and (c) RPOP3-1200 at 0.1 C.

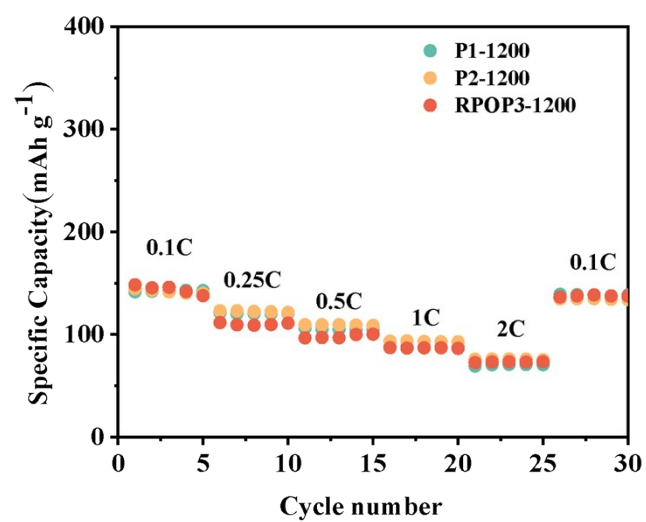

**Fig. S20** Rate performance of P1-1200, P2-1200 and RPOP3-1200.

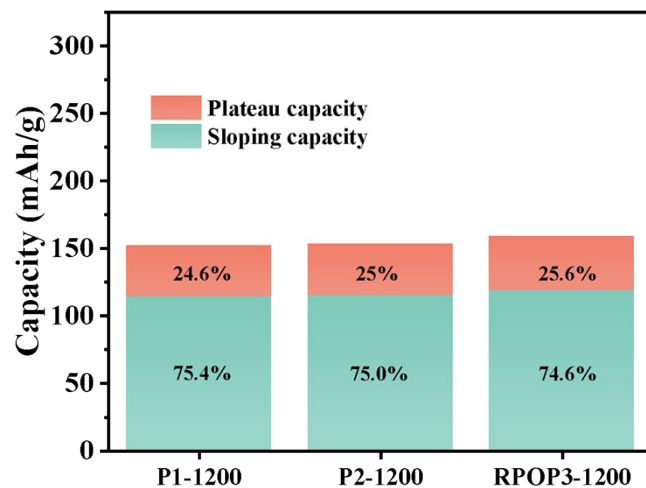

**Fig. S21** Slope and plateau contribution from second discharge at 0.1 C of P1-1200, P2-1200 and RPOP3-1200.

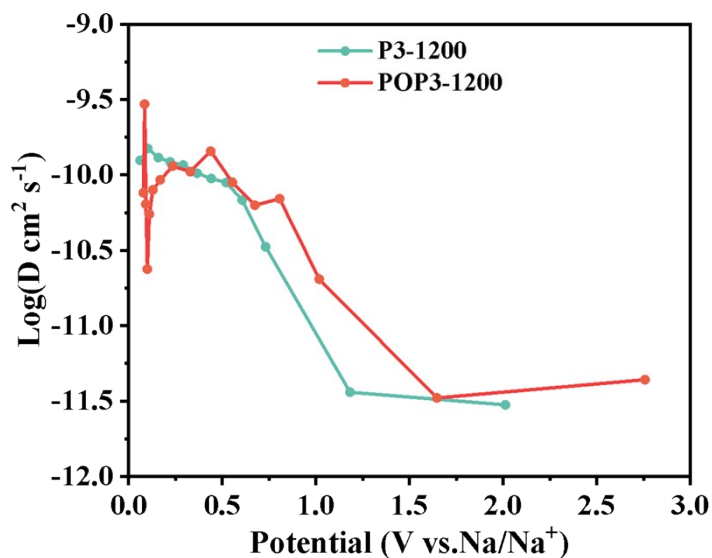

**Fig. S22** The  $\text{Na}^+$  diffusion coefficients of P3-1200 and POP3-1200 during charge calculated by GITT.

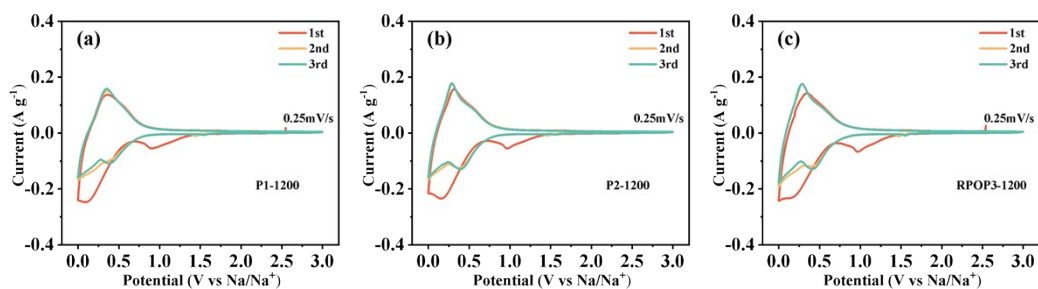

**Fig. S23** CV curves of (a) P1-1200, (b) P2-1200 and (c) RPOP3-1200 at 0.25  $\text{mV s}^{-1}$ .

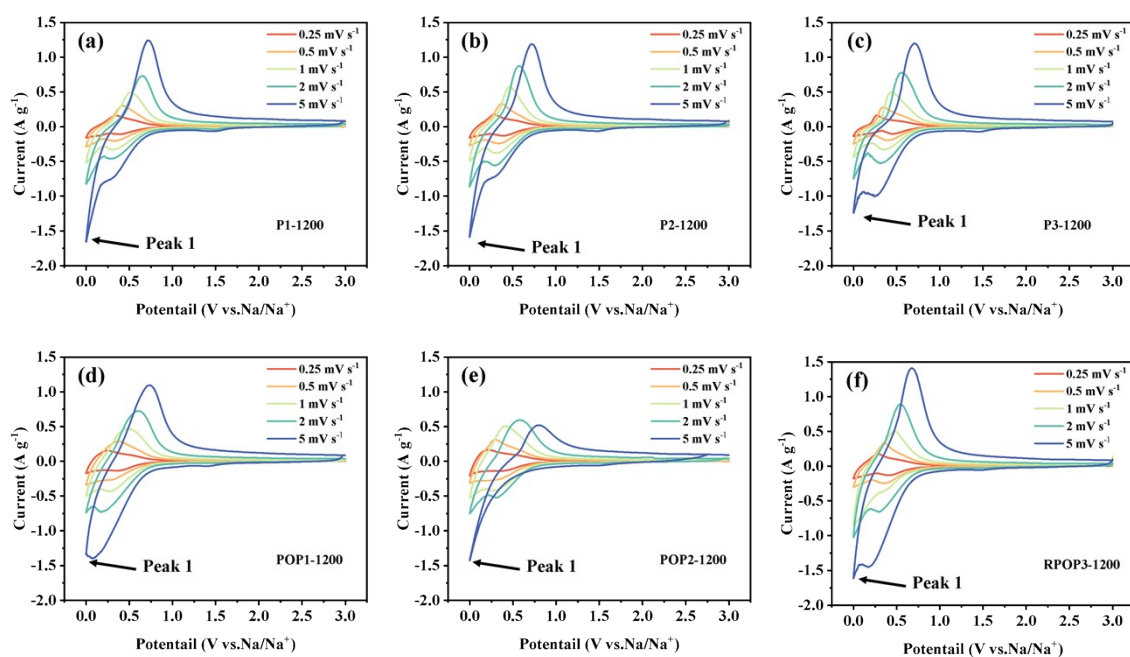

**Fig. S24** CV curves of (a) P1-1200, (b) P2-1200, (c) P3-1200, (d) POP1-1200, (e) POP2-1200 and (f) RPOP3-1200 at different scan rate.

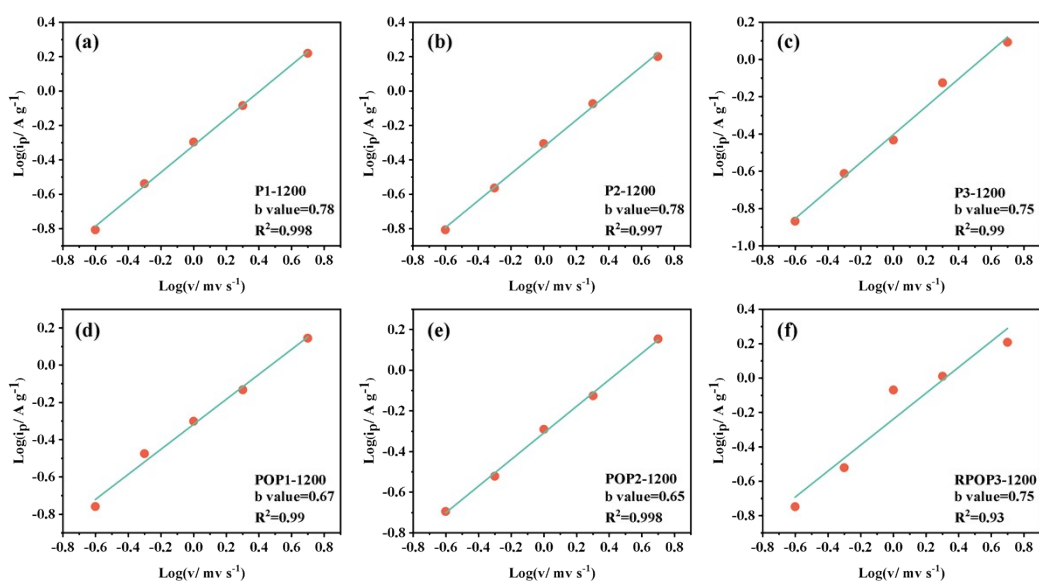

**Fig. S25** The correlations of scan rate ( $v$ ) and peak current ( $i_p$ ) for (a) P1-1200, (b) P2-1200, (c) P3-1200, (d) POP1-1200, (e) POP2-1200 and (f) RPOP3-1200.

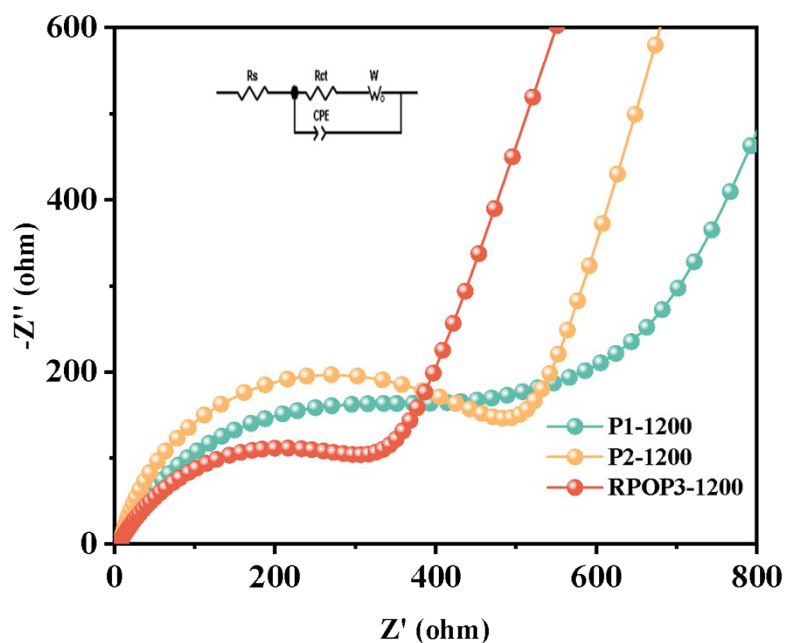

Fig. S26 Nyquist plots of P1-1200, P2-1200 and RPOP3-1200.

Table S1. Assignment details of FTIR spectra.<sup>2</sup>

| Group                                   | Position (cm <sup>-1</sup> ) | Vibration mode        |
|-----------------------------------------|------------------------------|-----------------------|
| Aromatic C-H                            | ~3040                        | Stretching            |
| CH <sub>3</sub>                         | ~2953                        | Asymmetric stretching |
| CH <sub>2</sub>                         | ~2920                        | Asymmetric stretching |
| C-H                                     | ~2891                        | Stretching            |
| CH <sub>3</sub>                         | ~2870                        | Symmetric stretching  |
| CH <sub>2</sub>                         | ~2850                        | Symmetric stretching  |
| CH <sub>2</sub> bridging aromatic rings | ~2830                        | Symmetric stretching  |

Table S2. Structural parameters of pristine CTPs according to XRD.

|    | $\gamma$ band/ $^{\circ}$ | $\pi$ band/ $^{\circ}$ | $A\gamma$ | $A\pi$  | far  |
|----|---------------------------|------------------------|-----------|---------|------|
| P1 | 21.93                     | 25.43                  | 3022.69   | 3139.92 | 0.51 |
| P2 | 20.76                     | 25.65                  | 2497.60   | 5469.31 | 0.69 |
| P3 | 20.52                     | 25.43                  | 1868.12   | 6100.21 | 0.77 |



**Table S3.** Crystalline parameters of samples according to XRD.

| Sample       | d002<br>(Å) | FWHM<br>(002) | Lc<br>(Å) | FWHM<br>(100) | La<br>(Å) |
|--------------|-------------|---------------|-----------|---------------|-----------|
| P1           | 3.5435      | 5.603         | 14.02     | 5.791         | 30.24     |
| P1-400       | 3.5289      | 4.952         | 15.86     | 4.615         | 37.85     |
| P1-500       | 3.4302      | 3.04          | 26.49     | 4.08          | 42.89     |
| P1-600       | 3.399       | 3.218         | 25.03     | 3.966         | 44.01     |
| P1-600(1h)   | 3.3919      | 3.635         | 22.16     | 4.007         | 43.63     |
| P1-1200      | 3.4012      | 3.491         | 23.08     | 3.066         | 57.14     |
| P2           | 3.5099      | 4.905         | 16.4      | 4.673         | 37.41     |
| P2-400       | 3.5028      | 4.848         | 16.58     | 4.324         | 40.4      |
| P2-500       | 3.4257      | 2.854         | 28.22     | 4.041         | 43.21     |
| P2-600       | 3.4023      | 3.56          | 22.62     | 3.902         | 44.77     |
| P2-600(1h)   | 3.3934      | 4.055         | 19.87     | 3.867         | 45.28     |
| P2-1200      | 3.4391      | 3.566         | 22.59     | 3.224         | 54.3      |
| P3           | 3.5092      | 5.398         | 14.9      | 4.626         | 37.73     |
| P3-400       | 3.4578      | 4.699         | 17.12     | 4.654         | 37.53     |
| P3-500       | 3.4262      | 2.96          | 27.2      | 4.391         | 39.79     |
| P3-600       | 3.4017      | 3.524         | 22.85     | 4.101         | 42.56     |
| P3-600(1h)   | 3.3899      | 3.957         | 20.36     | 3.968         | 44.04     |
| P3-1200      | 3.44        | 3.56          | 22.62     | 3.198         | 54.75     |
| POP1         | 3.5567      | 4.679         | 17.18     | 4.022         | 43.47     |
| POP1-400     | 3.4526      | 4.772         | 16.87     | 4.138         | 42.24     |
| POP1-500     | 3.4113      | 3.051         | 26.4      | 3.803         | 45.96     |
| POP1-600     | 3.4094      | 3.517         | 22.89     | 3.861         | 45.24     |
| POP1-600(1h) | 3.3922      | 3.789         | 21.21     | 3.429         | 50.97     |
| POP1-1200    | 3.4235      | 3.425         | 23.52     | 2.897         | 60.42     |
| POP2         | 3.435       | 3.656         | 22.02     | 4.367         | 40.01     |
| POP2-400     | 3.5196      | 4.911         | 16.37     | 4.54          | 38.5      |
| POP2-500     | 3.4978      | 3.93          | 20.48     | 4.234         | 41.25     |
| POP2-600     | 3.435       | 3.656         | 22.02     | 4.057         | 43.06     |
| POP2-600(1h) | 3.4069      | 4.325         | 18.6      | 4.096         | 42.72     |
| POP2-1200    | 3.4264      | 3.499         | 23.03     | 2.855         | 61.34     |
| POP3         | 3.6239      | 4.733         | 16.97     | 4.13          | 42.25     |

|               |        |       |       |       |       |
|---------------|--------|-------|-------|-------|-------|
| POP3-400      | 3.5164 | 4.741 | 16.95 | 4.495 | 38.84 |
| POP3-500      | 3.554  | 4.946 | 16.26 | 4.118 | 42.4  |
| POP3-600      | 3.5868 | 4.898 | 16.4  | 4.06  | 43.05 |
| POP3-600(1h)  | 3.6867 | 4.75  | 16.92 | 4.159 | 42.03 |
| POP3-1200     | 3.7718 | 4.846 | 16.91 | 3.836 | 45.69 |
| RPOP3         | 3.5667 | 4.578 | 17.57 | 4.202 | 41.67 |
| RPOP3-400     | 3.5559 | 4.306 | 18.67 | 4.084 | 42.78 |
| RPOP3-500     | 3.4372 | 3.167 | 25.42 | 4.156 | 42.06 |
| RPOP3-600     | 3.4379 | 3.56  | 22.62 | 4.015 | 43.47 |
| RPOP3-600(1h) | 3.4182 | 3.74  | 21.53 | 4.088 | 42.77 |
| RPOP3-1200    | 3.4111 | 3.485 | 23.12 | 3.105 | 56.41 |

**Table S4.** Physical parameters of CTP-derived carbons according to XRD.

| sample     | Disordered              |                    |        | Pseudo-graphitic        |                    |        | Graphite-like           |                    |        |
|------------|-------------------------|--------------------|--------|-------------------------|--------------------|--------|-------------------------|--------------------|--------|
|            | 2 $\theta$ / $^{\circ}$ | d002/ $\text{\AA}$ | Area/% | 2 $\theta$ / $^{\circ}$ | d002/ $\text{\AA}$ | Area/% | 2 $\theta$ / $^{\circ}$ | d002/ $\text{\AA}$ | Area/% |
| P1-1200    | -                       | -                  | -      | 22.78                   | 3.90               | 16.65  | 26.18                   | 3.40               | 83.35  |
| P2-1200    | -                       | -                  | -      | 22.49                   | 3.95               | 16.37  | 25.88                   | 3.44               | 83.63  |
| P3-1200    | -                       | -                  | -      | 22.57                   | 3.94               | 17.15  | 25.91                   | 3.44               | 82.85  |
| POP1-1200  | -                       | -                  | -      | 22.68                   | 3.92               | 14.21  | 25.98                   | 3.43               | 85.79  |
| POP2-1200  | -                       | -                  | -      | 22.66                   | 3.92               | 13.15  | 25.96                   | 3.43               | 86.85  |
| POP3-1200  | 19.17                   | 4.63               | 6.48   | 23.19                   | 3.83               | 70.22  | 26.24                   | 3.39               | 23.30  |
| RPOP3-1200 | -                       | -                  | -      | 22.70                   | 3.91               | 17.35  | 26.12                   | 3.41               | 82.65  |

**Table S5.** Assignments of Raman spectra.<sup>3</sup>

| Band   | Raman shift ( $\text{cm}^{-1}$ ) | Vibration mode | Structure                                                                   | Line shape |
|--------|----------------------------------|----------------|-----------------------------------------------------------------------------|------------|
| G      | ~1590                            | E2g symmetry   | Ideal graphitic lattice                                                     | Lorentzian |
| D (D1) | ~1350                            | A1g symmetry   | Graphene layer edges                                                        | Lorentzian |
| D2     | ~1620                            | E2g symmetry   | Surface graphene layers                                                     | Lorentzian |
| D3     | ~1500                            |                | Amorphous carbon                                                            | Gaussian   |
| D4     | ~1200                            | A1g symmetry   | sp <sup>2</sup> -sp <sup>3</sup> bonds or C–C and C=C stretching vibrations | Lorentzian |

**Table S6.** Electrochemical performance comparison between POP3-1200 and other pitch-derived carbons

| Materials | Capacity | rate capacity | Cyclability | Electrolyte | ICE |
|-----------|----------|---------------|-------------|-------------|-----|
|-----------|----------|---------------|-------------|-------------|-----|

|                                                                                                         | (mAh g <sup>-1</sup><br>/mA g <sup>-1</sup> ) | (mAh g <sup>-1</sup> /mA g <sup>-1</sup> ) |                        |                                                      | (%)   |
|---------------------------------------------------------------------------------------------------------|-----------------------------------------------|--------------------------------------------|------------------------|------------------------------------------------------|-------|
| This work                                                                                               | 276.8/30                                      | 87 / 2C                                    | 91.2% after 500 cycles | 1 M NaClO <sub>4</sub> in DMC/<br>EC/EMC with 2% FEC | 67.50 |
| Pre-oxidized pitch derived<br>carbon <sup>4</sup>                                                       | 300.83/20                                     | ~60 / 500                                  | ~73% after 100 cycles  | 1M NaClO <sub>4</sub> in EC/DEC                      | 82.82 |
| Pre-oxidized pitch derived<br>carbon <sup>5</sup>                                                       | 300.6/30                                      | ~77 / 2C                                   | 93.1% after 200 cycles | 1M NaPF <sub>6</sub> in EC/DMC                       | 88.60 |
| Pitch derived 3D porous carbon <sup>6</sup>                                                             | 215/50                                        | 97 / 5000                                  | 93% after 120 cycles   | 1M NaClO <sub>4</sub> in EC/DMC                      | 60    |
| Pitch derived carbon solidified by<br>Mg(NO <sub>3</sub> ) <sub>2</sub> •6H <sub>2</sub> O <sup>7</sup> | 278/30                                        | 74/ 2C                                     | 98% after 300 cycles   | 1M NaPF <sub>6</sub> in EC/DMC                       | /     |
| Pitch derived carbon via<br>nanocasting <sup>8</sup>                                                    | 130/0.2C                                      | ~120/2C                                    | /                      | 1M NaPF <sub>6</sub> in EC/DMC                       | /     |
| N,P-doped pitch derived carbon <sup>9</sup>                                                             | 285/100                                       | 140/5000                                   | 82% after 100 cycles   | 1MNaClO <sub>4</sub> in EC/DMC                       | 42.1  |
| Pitch derived Hard–Soft Carbon<br>Composite <sup>10</sup>                                               | 282/30                                        | ~80/1200                                   | 85% after 100 cycles   | 1M NaClO <sub>4</sub> in EC/DMC                      | 80    |
| Pitch derived soft carbon <sup>11</sup>                                                                 | 263/0.15C                                     | 124 /3600                                  | 70% after 500 cycles   | 1MNaPF <sub>6</sub> in EC/DMC                        | 80    |

**Table S7.** Fitting results of Nyquist plots.

| Sample     | R <sub>s</sub> (Ω) | R <sub>ct</sub> (Ω) |
|------------|--------------------|---------------------|
| P1-1200    | 5.044              | 405.9               |
| P2-1200    | 7.484              | 434.4               |
| P3-1200    | 6.866              | 246.1               |
| POP1-1200  | 7.897              | 299.8               |
| POP2-1200  | 6.696              | 494.3               |
| POP3-1200  | 7.575              | 494.7               |
| RPOP3-1200 | 5.359              | 377.9               |

## References

- 1 S. Zhang, Q. Liu, H. Zhang, R. Ma, K. Li, Y. Wu and B. J. Teppen, *Carbon*, 2020, **157**, 714–723.
- 2 C. Russo, F. Stanzione, A. Tregrossi and A. Cijajolo, *Carbon*, 2014, **74**, 127–138.
- 3 A. Sadezky, H. Muckenhuber, H. Grothe, R. Niessner and U. Pöschl, *Carbon*, 2005, **43**, 1731–1742.
- 4 R. Xu, Z. Yi, M. Song, J. Chen, X. Wei, F. Su, L. Dai, G. Sun, F. Yang, L. Xie and C.-M. Chen, *Carbon*, 2023, **206**, 94–104.
- 5 Y. Lu, C. Zhao, X. Qi, Y. Qi, H. Li, X. Huang, L. Chen and Y.-S. Hu, *Adv. Energy Mater.*, 2018, **8**, 1800108.

- 6 D. Qiu, T. Cao, J. Zhang, S.-W. Zhang, D. Zheng, H. Wu, W. Lv, F. Kang and Q.-H. Yang, *Journal of Energy Chemistry*, 2019, **31**, 101–106.
- 7 Y. Qi, Y. Lu, L. Liu, X. Qi, F. Ding, H. Li, X. Huang, L. Chen and Y.-S. Hu, *Energy Storage Materials*, 2020, **26**, 577–584.
- 8 S. Wenzel, T. Hara, J. Janek and P. Adelhelm, *Energy Environ. Sci.*, 2011, **4**, 3342.
- 9 C. Gao, J. Feng, J. Dai, Y. Pan, Y. Zhu, W. Wang, Y. Dong, L. Cao, L. Guan, L. Pan, H. Hu and M. Wu, *Carbon*, 2019, **153**, 372–380.
- 10 F. Xie, Z. Xu, A. C. S. Jensen, H. Au, Y. Lu, V. Araullo-Peters, A. J. Drew, Y. Hu and M. Titirici, *Adv. Funct. Mater.*, 2019, **29**, 1901072.
- 11 Y. Qi, Y. Lu, F. Ding, Q. Zhang, H. Li, X. Huang, L. Chen and Y. Hu, *Angew. Chem.*, 2019, **131**, 4405–4409.
